# Supplementary material for: Sepsis-Associated Acute Kidney Disease and Long-term Kidney Outcomes
Source: PubMed Central journal article supplement — Kidney Med. 2021 Apr 16;3(4):507–514.e1. doi: 10.1016/j.xkme.2021.02.007 (PMC8350838; doi:10.1016/j.xkme.2021.02.007), 2021-04-16
Supplement: mmc1.pdf [file mmc1.pdf]

**Figure S1. Adjusted Survival Curve for CKD Incidence, Progression, KFRT, or Death for Patients with Measured (non-imputed) Baseline Serum Creatinine Data**

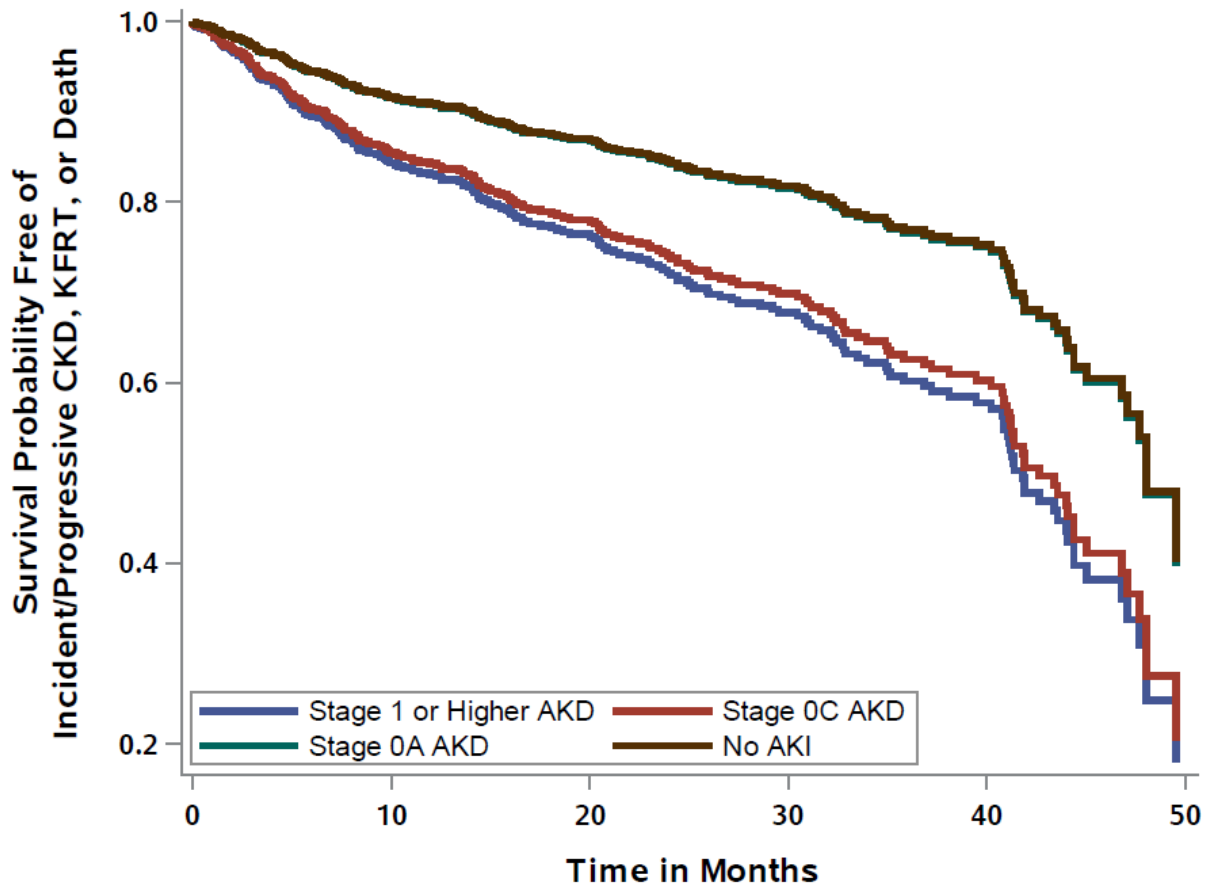

**Figure S2. Adjusted Survival Curve for CKD Incidence, KFRT, or Death for Patients Without Baseline CKD**

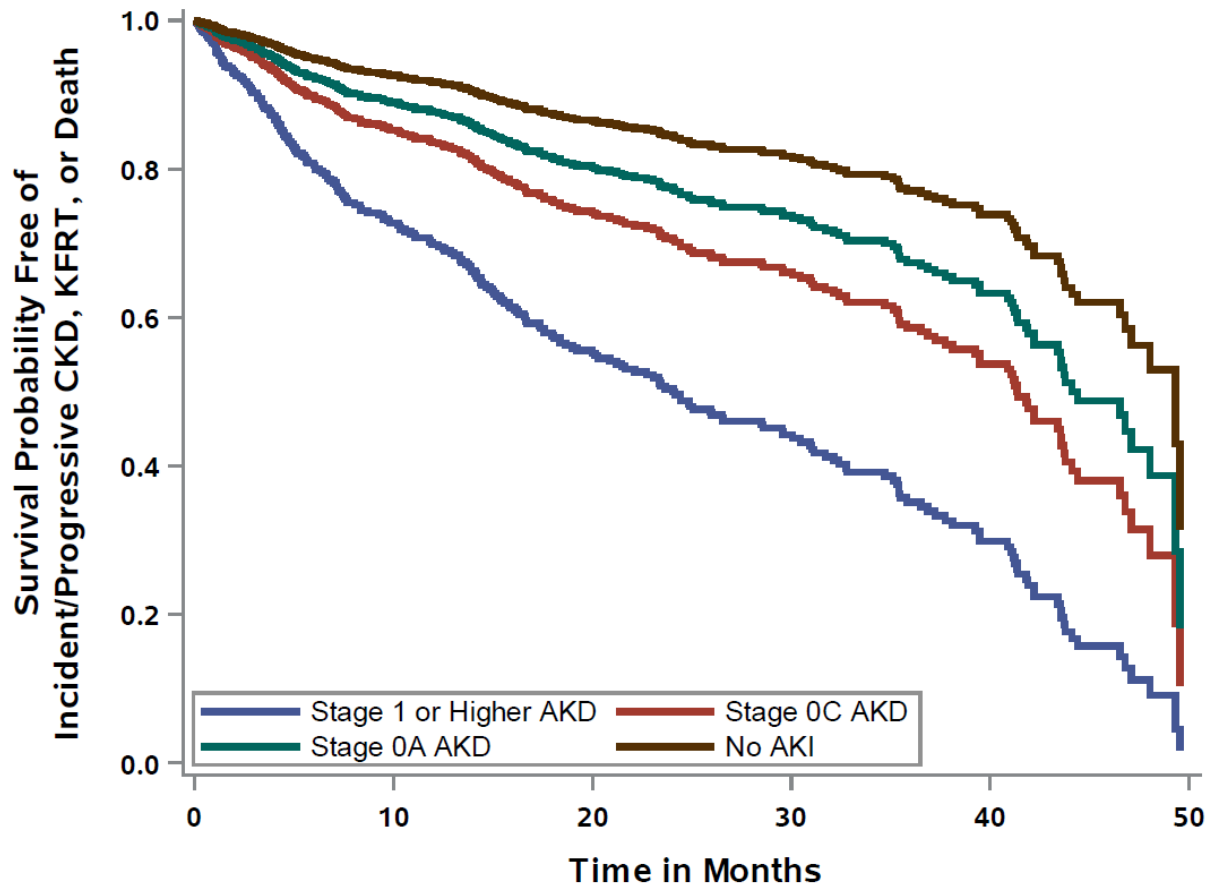

**Figure S3. Adjusted Survival Curve for CKD Progression, KFRT, or Death for Patients With Baseline CKD**

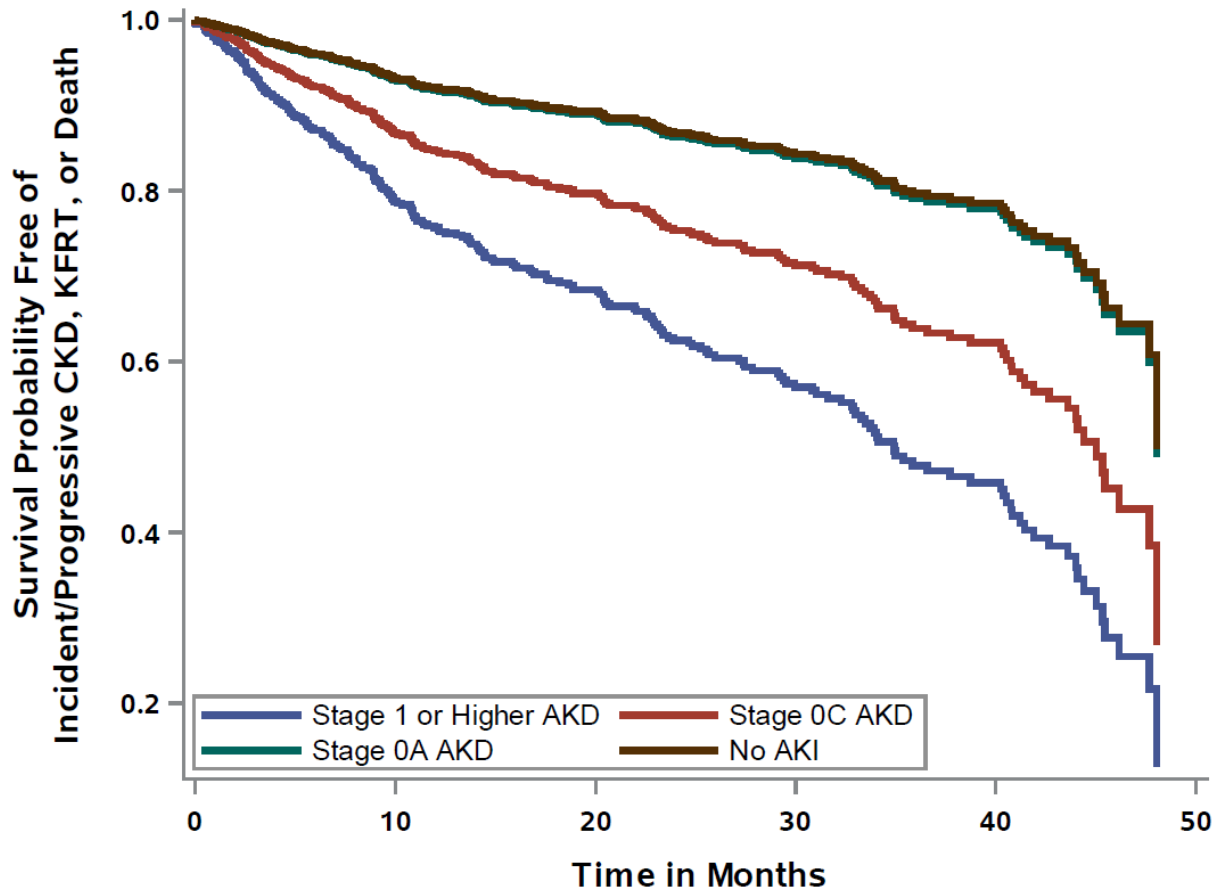

**Table S1. Multiple Imputation Table**

|                                                                                  | n    | Mean | SD   | Min  | Max  | Median | 25 <sup>th</sup> % | 75 <sup>th</sup> % |
|----------------------------------------------------------------------------------|------|------|------|------|------|--------|--------------------|--------------------|
| <u>Partial Cohort</u> (Measured Baseline Serum Creatinine Available)             | 1177 | 1.29 | 0.60 | 0.20 | 4.70 | 1.20   | 0.90               | 1.50               |
| <u>Entire Cohort</u> (Multiple Imputation for Missing Baseline Serum Creatinine) | 2307 | 1.33 | 0.51 | 0.20 | 4.70 | 1.29   | 1.00               | 1.57               |

**Table S2. Timing of Serum Creatinine Values Used for AKD Staging in Patients Surviving AKI**

| Entire Cohort with Multiple Imputation for Missing Baseline Serum Creatinine (n=1231) | Stage $\geq$ 1 AKD (n =251) | Stage 0C AKD (n =326) | Stage 0A AKD (n =654) |
|---------------------------------------------------------------------------------------|-----------------------------|-----------------------|-----------------------|
| Last SCr during hospitalization, n (%)                                                | 236 (94.02)                 | 305 (93.56)           | 604 (92.35)           |
| SCr within 90 days after discharge, n (%)                                             | 15 (5.98)                   | 21 (6.44)             | 50 (7.65)             |
| Partial Cohort with Measured Data for Baseline Serum Creatinine (n=623)               | Stage $\geq$ 1 AKD (n =96)  | Stage 0C AKD (n =168) | Stage 0A AKD (n =359) |
| Last SCr during hospitalization, n (%)                                                | 90 (93.75)                  | 157 (93.45)           | 339 (94.43)           |
| SCr within 90 days after discharge, n (%)                                             | 6 (6.25)                    | 11 (6.55)             | 20 (5.57)             |

**Table S3. Serum Creatinine Measurements Used for CKD Adjudication**

| Entire Cohort with Multiple Imputation for Missing Baseline Serum Creatinine (n=2307)           | Stage $\geq$ 1 AKD (n =251) | Stage 0C AKD (n =326) | Stage 0A AKD (n =654) | No AKI (n =1076) |
|-------------------------------------------------------------------------------------------------|-----------------------------|-----------------------|-----------------------|------------------|
| Only one SCr measure available in the follow-up period for CKD outcome adjudication, n (%)      | 15 (5.98%)                  | 21 (6.44%)            | 50 (7.65%)            | 83 (7.71%)       |
| At least two SCr measures available in the follow-up period for CKD outcome adjudication, n (%) | 236 (94.02%)                | 305 (93.56%)          | 604 (92.35%)          | 993 (92.29%)     |
| Partial Cohort with Measured Data for Baseline Serum Creatinine (n=1177)                        | Stage $\geq$ 1 AKD (n =96)  | Stage 0C AKD (n =168) | Stage 0A AKD (n =359) | No AKI (n =554)  |
| At least one SCr measure available in the follow-up period for CKD outcome adjudication, n (%)  | 6 (6.25%)                   | 11 (6.55%)            | 20 (5.57%)            | 41 (7.40%)       |
| At least two SCr measures available in the follow-up period for CKD outcome adjudication, n (%) | 90 (93.75%)                 | 157 (93.45%)          | 339 (94.43%)          | 513 (92.60%)     |

**Table S4. Study Outcomes by Stage of AKD for Patients Surviving AKI and for Patients Without AKI**

| Entire Cohort with Multiple Imputation for Missing Baseline Serum Creatinine (n=2307) | Stage ≥1 AKD (n =251) | Stage 0C AKD (n =326) | Stage 0A AKD (n =654) | No AKI (n =1076) |
|---------------------------------------------------------------------------------------|-----------------------|-----------------------|-----------------------|------------------|
| Incident CKD, n (%) <sup>a</sup>                                                      | 71 (28.3)             | 60 (18.4)             | 50 (7.7)              | 51 (4.7)         |
| Progressive CKD, n (%) <sup>a</sup>                                                   | 65 (25.9)             | 35 (10.7)             | 37 (5.7)              | 28 (2.6)         |
| Doubling of SCr, n (%) <sup>a</sup>                                                   | 23 (9.2)              | 17 (5.2)              | 23 (3.5)              | 23 (2.1)         |
| Dialysis, n (%) <sup>a</sup>                                                          | 57 (22.7)             | 17 (5.2)              | 23 (3.5)              | 28 (2.6)         |
| Death, n (%)                                                                          | 23 (9.2)              | 26 (8.0)              | 55 (8.4)              | 87 (8.1)         |
| Partial Cohort with Measured Data for Baseline Serum Creatinine (n=1177)              | Stage ≥1 AKD (n =96)  | Stage 0C AKD (n =168) | Stage 0A AKD (n =359) | No AKI (n =554)  |
| Incident CKD, n (%) <sup>a</sup>                                                      | 29 (30.2)             | 32 (19.1)             | 33 (9.2)              | 35 (6.3)         |
| Progressive CKD, n (%) <sup>a</sup>                                                   | 7 (7.3)               | 14 (8.3)              | 12 (3.3)              | 16 (2.9)         |
| Doubling of SCr, n (%) <sup>a</sup>                                                   | 21 (21.9)             | 15 (8.9)              | 17 (4.7)              | 20 (3.6)         |
| Dialysis, n (%)                                                                       | 8 (8.3)               | 7 (4.2)               | 13 (3.6)              | 15 (2.7)         |
| Death, n (%)                                                                          | 8 (8.3)               | 11 (6.6)              | 28 (7.8)              | 39 (7.0)         |

CKD = chronic kidney disease; SCr = serum creatinine

<sup>a</sup>p<0.05 for comparison across all 4 groups

**Table S5. Cox Proportional-Hazards Model for Incident or Progressive CKD, KFRT, or Death by Baseline CKD Status**

| Complete Cohort (n=1231)                                      | Adjusted HR <sup>a</sup> | 95% CI    | Adjusted HR <sup>b</sup> | 95% CI    |
|---------------------------------------------------------------|--------------------------|-----------|--------------------------|-----------|
| <b>A. No CKD at Baseline: Incident CKD/KFRT/death (n=607)</b> |                          |           |                          |           |
| <b>AKD Stage at Hospital Discharge or Within 90 Days</b>      |                          |           |                          |           |
| Stage 0C vs 0A AKD                                            | 1.43                     | 0.97-2.12 | 1.36                     | 0.93-2.00 |
| Stage ≥1 vs 0A AKD                                            | 2.82                     | 1.89-4.21 | 2.72                     | 1.90-3.91 |
| Stage ≥1 vs 0C AKD                                            | 1.97                     | 1.32-2.94 | 2.00                     | 1.38-2.89 |
| Age, 10-year                                                  | 1.10                     | 0.98-1.22 | 1.11                     | 1.00-1.23 |
| Man vs woman                                                  | 0.93                     | 0.68-1.27 | --                       | --        |
| Black vs other                                                | 1.09                     | 0.81-1.48 | --                       | --        |
| Anemia                                                        | 1.75                     | 1.10-2.78 | 1.64                     | 1.04-2.59 |
| Diabetes                                                      | 0.72                     | 0.48-1.07 | --                       | --        |
| Log-transformed baseline eGFR                                 | 0.72                     | 0.41-1.26 | --                       | --        |
| AKI Severity                                                  |                          |           |                          |           |
| AKI severity KDIGO 2-3 vs 1                                   | 0.94                     | 0.67-1.32 | --                       | --        |
| AKI severity KDIGO 3D vs 1                                    | 1.10                     | 0.66-1.85 | --                       | --        |
| SOFA score ≥4 vs <4                                           | 1.68                     | 1.22-2.30 | 1.65                     | 1.21-2.25 |
| <b>B. CKD at Baseline: Progressive CKD/KFRT/death (n=624)</b> |                          |           |                          |           |
| <b>AKD Stage at Hospital Discharge or Within 90 Days</b>      |                          |           |                          |           |
| Stage 0C vs 0A AKD                                            | 1.97                     | 1.32-2.93 | 1.94                     | 1.31-2.88 |
| Stage ≥1 vs 0A AKD                                            | 3.28                     | 2.23-4.84 | 3.26                     | 2.23-4.78 |
| Stage ≥1 vs 0C AKD                                            | 1.67                     | 1.12-2.48 | 1.68                     | 1.13-2.49 |
| Age, 10-year                                                  | 1.08                     | 0.97-1.21 | --                       | --        |
| Man vs woman                                                  | 0.95                     | 0.70-1.30 | --                       | --        |
| Black vs other                                                | 1.40                     | 1.02-1.92 | 1.41                     | 1.03-1.92 |
| Anemia                                                        | 1.61                     | 0.89-2.92 | --                       | --        |
| Diabetes                                                      | 1.36                     | 0.97-1.90 | 1.39                     | 1.00-1.95 |
| Log-transformed baseline eGFR                                 | 0.56                     | 0.32-1.00 | 0.52                     | 0.30-0.91 |
| AKI Severity                                                  |                          |           |                          |           |
| AKI severity KDIGO 2-3 vs 1                                   | 1.39                     | 0.96-2.02 | 1.41                     | 0.98-2.03 |
| AKI severity KDIGO 3D vs 1                                    | 1.62                     | 1.05-2.50 | 1.55                     | 1.03-2.33 |
| SOFA score ≥4 vs <4                                           | 1.11                     | 0.81-1.53 | --                       | --        |

<sup>a</sup>Initial model; <sup>b</sup>Final model after backward selection



**Table S6. Cox Proportional-Hazards Model for Doubling of Serum Creatinine, KFRT, or Death**

| Complete Cohort (n=1231)                                 | Adjusted HR <sup>a</sup> | 95% CI    | Adjusted HR <sup>b</sup> | 95% CI    |
|----------------------------------------------------------|--------------------------|-----------|--------------------------|-----------|
| <b>AKD Stage at Hospital Discharge or Within 90 Days</b> |                          |           |                          |           |
| Stage 0C vs 0A AKD                                       | 1.18                     | 0.82-1.71 | 1.19                     | 0.83-1.73 |
| Stage ≥1 vs 0A AKD                                       | 2.40                     | 1.70-3.38 | 2.38                     | 1.69-3.35 |
| Stage ≥1 vs 0C AKD                                       | 2.02                     | 1.38-2.98 | 1.99                     | 1.36-2.92 |
| Age, 10-year                                             | 1.02                     | 0.93-1.13 | --                       | --        |
| Man vs woman                                             | 0.96                     | 0.73-1.27 | --                       | --        |
| Black vs other                                           | 1.61                     | 1.21-2.14 | 1.61                     | 1.21-2.14 |
| Anemia                                                   | 1.87                     | 1.16-3.03 | 1.89                     | 1.17-3.05 |
| Diabetes                                                 | 1.11                     | 0.81-1.52 | --                       | --        |
| Log-transformed baseline eGFR                            | 0.63                     | 0.44-0.89 | 0.61                     | 0.43-0.85 |
| <b>AKI Severity</b>                                      |                          |           |                          |           |
| AKI severity KDIGO 2-3 vs 1                              | 1.10                     | 0.79-1.53 | 1.08                     | 0.78-1.51 |
| AKI severity KDIGO 3D vs 1                               | 1.70                     | 1.14-2.52 | 1.65                     | 1.13-2.43 |
| SOFA score ≥4 vs <4                                      | 1.45                     | 1.08-1.94 | 1.45                     | 1.08-1.93 |

<sup>a</sup>Initial model; <sup>b</sup>Final model after backward selection

**Table S7. Cox Proportional-Hazards Model for Incident or Progressive CKD**

| Complete Cohort (n=1231)                                 | Adjusted HR <sup>a</sup> | 95% CI    | Adjusted HR <sup>b</sup> | 95% CI    |
|----------------------------------------------------------|--------------------------|-----------|--------------------------|-----------|
| <b>AKD Stage at Hospital Discharge or Within 90 Days</b> |                          |           |                          |           |
| Stage OC vs OA AKD                                       | 2.18                     | 1.59-3.00 | 2.23                     | 1.63-3.06 |
| Stage ≥1 vs OA AKD                                       | 4.26                     | 3.12-5.81 | 4.65                     | 3.48-6.22 |
| Stage ≥1 vs OC AKD                                       | 1.95                     | 1.45-2.62 | 2.09                     | 1.58-2.76 |
| Age, 10-year                                             | 1.11                     | 1.02-1.21 | 1.09                     | 1.01-1.18 |
| Man vs woman                                             | 0.92                     | 0.73-1.17 | --                       | --        |
| Black vs other                                           | 1.22                     | 0.96-1.54 | 1.22                     | 0.97-1.55 |
| Anemia                                                   | 1.63                     | 1.10-2.41 | 1.61                     | 1.09-2.36 |
| Diabetes                                                 | 0.93                     | 0.70-1.24 | --                       | --        |
| Log-transformed baseline eGFR                            | 1.06                     | 0.80-1.41 | --                       | --        |
| <b>AKI Severity</b>                                      |                          |           |                          |           |
| AKI severity KDIGO 2-3 vs 1                              | 1.21                     | 0.92-1.59 | --                       | --        |
| AKI severity KDIGO 3D vs 1                               | 1.27                     | 0.88-1.82 | --                       | --        |
| SOFA score ≥4 vs <4                                      | 1.52                     | 1.19-1.95 | 1.55                     | 1.22-1.97 |

<sup>a</sup>Initial model; <sup>b</sup>Final model after backward selection

**Table S8. Cox Proportional-Hazards Model for KFRT or Death**

| Complete Cohort (n=1231)                          | Adjusted HR <sup>a</sup> | 95% CI    | Adjusted HR <sup>b</sup> | 95% CI    |
|---------------------------------------------------|--------------------------|-----------|--------------------------|-----------|
| AKD Stage at Hospital Discharge or Within 90 Days |                          |           |                          |           |
| Stage 0C vs 0A AKD                                | 1.07                     | 0.71-1.60 | 1.07                     | 0.72-1.60 |
| Stage ≥1 vs 0A AKD                                | 2.21                     | 1.54-3.19 | 2.20                     | 1.53-3.17 |
| Stage ≥1 vs 0C AKD                                | 2.07                     | 1.36-3.17 | 2.06                     | 1.35-3.15 |
| Age, 10-year                                      | 1.02                     | 0.92-1.13 | --                       | --        |
| Man vs woman                                      | 1.04                     | 0.77-1.41 | --                       | --        |
| Black vs other                                    | 1.82                     | 1.33-2.48 | 1.81                     | 1.33-2.47 |
| Anemia                                            | 1.65                     | 1.00-2.71 | 1.66                     | 1.02-2.73 |
| Diabetes                                          | 1.05                     | 0.75-1.48 | --                       | --        |
| Log-transformed baseline eGFR                     | 0.44                     | 0.30-0.64 | 0.43                     | 0.30-0.62 |
| AKI Severity                                      |                          |           |                          |           |
| AKI severity KDIGO 2-3 vs 1                       | 1.01                     | 0.70-1.46 | 1.01                     | 0.70-1.45 |
| AKI severity KDIGO 3D vs 1                        | 1.76                     | 1.16-2.66 | 1.73                     | 1.16-2.59 |
| SOFA score ≥4 vs <4                               | 1.34                     | 0.99-1.83 | 1.35                     | 0.99-1.84 |

<sup>a</sup>Initial model; <sup>b</sup>Final model after backward selection

**Table S9. Cox Proportional-Hazards Model for CKD Incidence, Progression, KFRT, or Death for Patients with Measured (non-imputed) Baseline Serum Creatinine Data**

| Partial Cohort (n=623)                                   | Adjusted HR <sup>a</sup> | 95% CI    | Adjusted HR <sup>b</sup> | 95% CI    |
|----------------------------------------------------------|--------------------------|-----------|--------------------------|-----------|
| <b>AKD Stage at Hospital Discharge or Within 90 Days</b> |                          |           |                          |           |
| Stage 0C vs 0A AKD                                       | 1.74                     | 1.18-2.58 | 1.78                     | 1.21-2.61 |
| Stage ≥1 vs 0A AKD                                       | 1.96                     | 1.25-3.06 | 2.15                     | 1.42-3.28 |
| Stage ≥1 vs 0C AKD                                       | 1.12                     | 0.70-1.79 | 1.21                     | 0.78-1.87 |
| Age, 10-year                                             | 1.03                     | 0.91-1.16 | --                       | --        |
| Man vs woman                                             | 0.99                     | 0.71-1.39 | --                       | --        |
| Black vs other                                           | 1.22                     | 0.87-1.71 | --                       | --        |
| Anemia                                                   | 1.96                     | 1.07-3.60 | 1.84                     | 1.02-3.33 |
| Diabetes                                                 | 0.95                     | 0.64-1.40 | --                       | --        |
| Log-transformed baseline eGFR                            | 1.00                     | 0.69-1.44 | --                       | --        |
| <b>AKI Severity</b>                                      |                          |           |                          |           |
| AKI severity KDIGO 2-3 vs 1                              | 1.21                     | 0.84-1.76 | --                       | --        |
| AKI severity KDIGO 3D vs 1                               | 1.69                     | 0.99-2.88 | --                       | --        |
| SOFA score ≥4 vs <4                                      | 1.37                     | 0.96-1.94 | 1.39                     | 0.99-1.95 |

<sup>a</sup>Initial model; <sup>b</sup>Final model after backward selection
